# Supplementary material for: Isoindigo-based polymer field-effect transistors: effects of selenophene-substitution on high charge carrier mobility
Source: Royal Society of Chemistry journal article supplement (doi:10.1039/c5cc02104a), 2015-01-01
Supplement: c5cc02104a1.pdf [file c5cc02104a1.pdf]

## Electronic Supplementary Information

### Isoindigo-based polymer field-effect transistors: effects of selenophene-substitution toward high charge carrier mobility

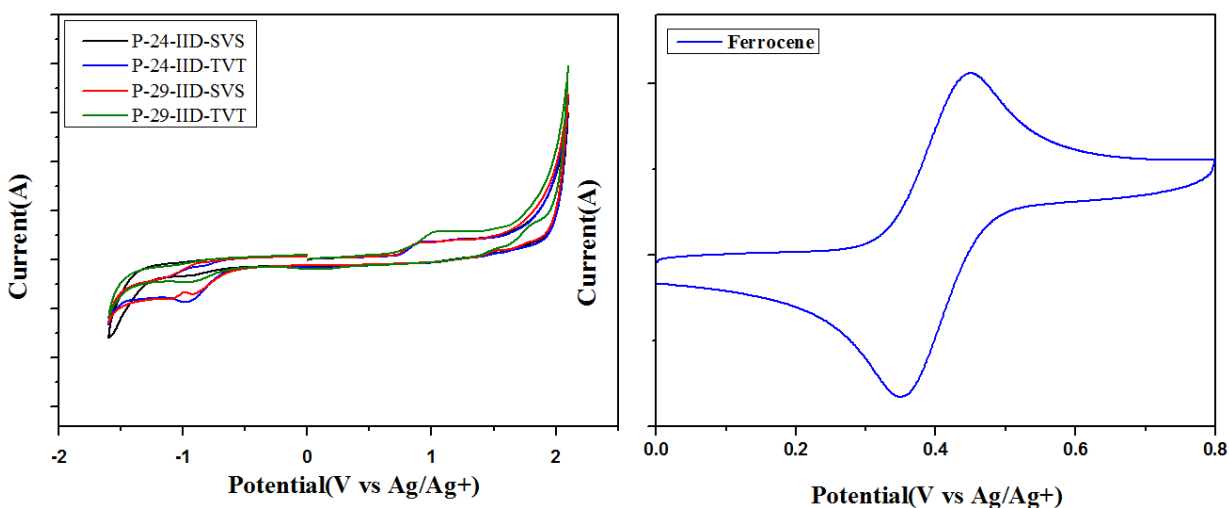

Figure S1. Cyclic voltammetry curves of (left) polymeric semiconductors used in this study and (right) ferrocene reference.

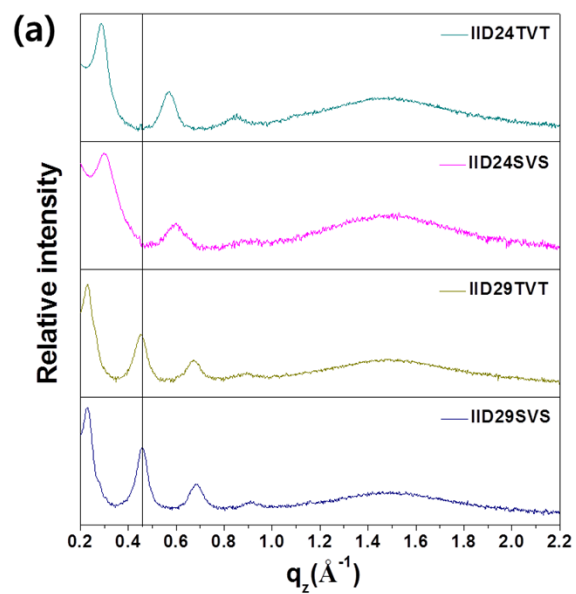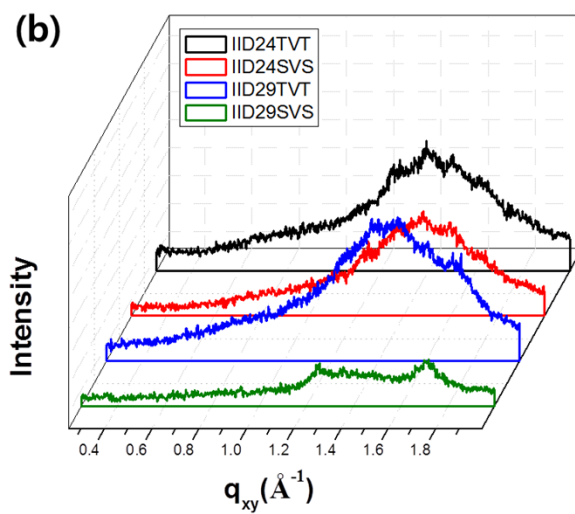

1

2 **Figure S2. Extracted (a) out-of-plane and (b) in-plane diffraction profiles of polymers**

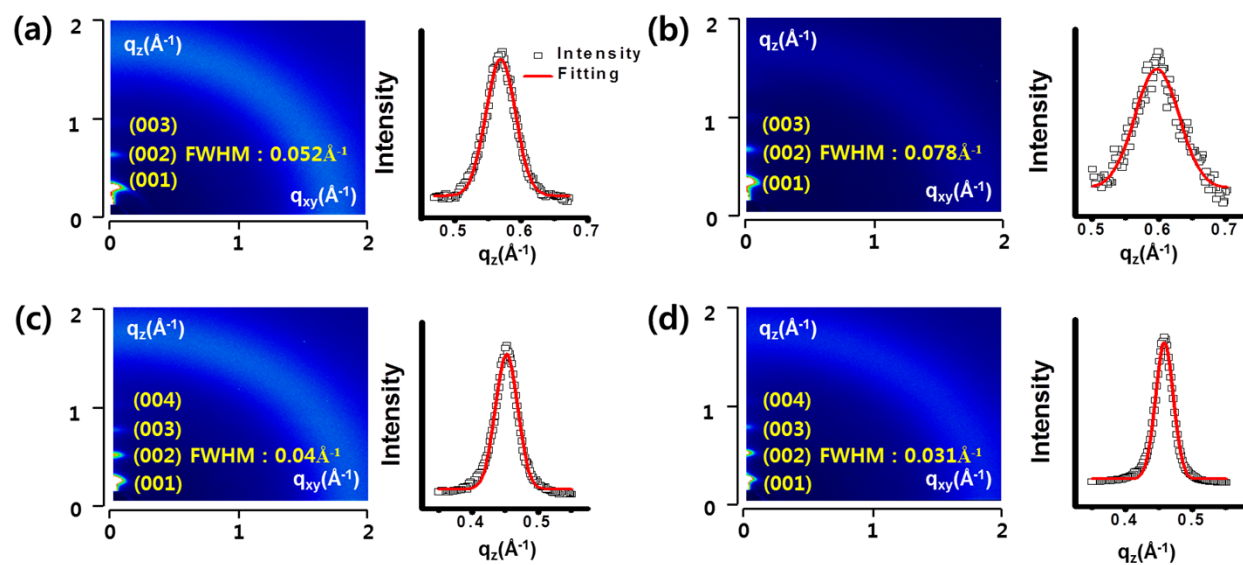

Figure S3. The comparison of FWHM between all polymers

1

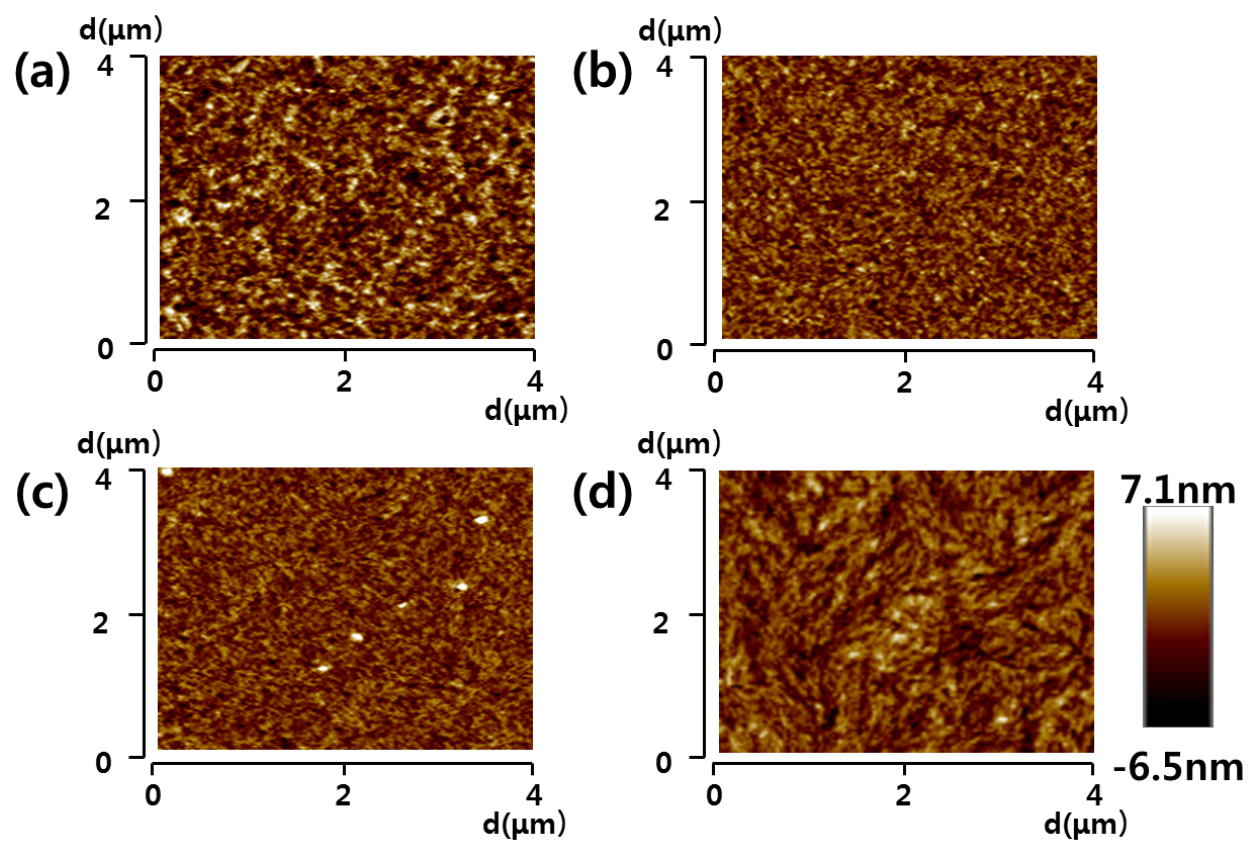

2

3 **Figure S4. AFM images of (a) P-24-IID-TVT, (b) P-24-IID-SVS, (c) P-29-IID-TVT and (d)**

4 **P-29-IID-SVS**

5

1 Table S1.

| <b>Polymer</b> | $\lambda_{max}^{0-0}$ <b>sol</b><br><b>(nm)</b> | $\lambda_{max}^{0-1}$ <b>sol</b><br><b>(nm)</b> | $\lambda_{max}^{0-0}$ <i>film</i><br><b>(nm)</b> | $\lambda_{max}^{0-1}$ <i>film</i><br><b>(nm)</b> | $E_g^{opt}$<br><b>(eV)</b> |
|----------------|-------------------------------------------------|-------------------------------------------------|--------------------------------------------------|--------------------------------------------------|----------------------------|
| P24-IID-TVT    | 707                                             | 645                                             | 699                                              | 635                                              | 1.65                       |
| P24-IID-SVS    | 718                                             | 656                                             | 717                                              | 651                                              | 1.6                        |
| P29-IID-TVT    | 725                                             | 661                                             | 713                                              | 647                                              | 1.59                       |
| P29-IID-SVS    | 739                                             | 685                                             | 732                                              | 663                                              | 1.55                       |

Table S2.

| Alkyl       | Oxidation onset (eV) | Reduction onset (eV) | HOMO (eV) | LUMO (eV) | Band gap (eV) |
|-------------|----------------------|----------------------|-----------|-----------|---------------|
| P24-IID-SVS | 0.83                 | -0.65                | -5.29     | -3.81     | 1.48          |
| P24-IID-TVT | 0.84                 | -0.60                | -5.30     | -3.86     | 1.46          |
| P29-IID-SVS | 0.76                 | -0.59                | -5.22     | -3.87     | 1.37          |
| P29-IID-TVT | 0.79                 | -0.64                | -5.25     | -3.82     | 1.43          |

\* Ferrocene : 4.84 - 0.38 = 4.46 eV

## 1 **Characterization**

2 **GIXD** : GIXS data were measured at 3C beam line of Pohang accelerator laboratory. In GIXS,  
3 the wavelength of the incident X-ray was 1.213Å and the sample to detector distance was  
4 209.97mm. The electrical characteristics of the transistors were measured by 4156A Precision  
5 semiconductor parameter analyzers (Agilent Technologies).

6 **AFM** : All the morphological images were obtained by using an atomic force microscope (AFM:  
7 XE-100, PISA).

8 **Measurement** : The electrical characteristics of the transistors were measured by 4156A  
9 precision semiconductor parameter analyzers (Agilent Technologies).

## 10 **Device fabrication**

11 Top-contact OFETs were fabricated on a common gate of highly n-doped silicon with a 100 nm  
12 thick thermally grown SiO<sub>2</sub> dielectric layer. The dielectric layer was further modified by OTS by  
13 dipping in toluene solution. Solutions containing the polymer semiconductors were spin-coated  
14 at 2000 rpm from 0.5 - 1 wt% solutions to form thin films with a nominal thickness of 30 nm  
15 regardless the choice of processing solvents, as confirmed using a surface profiler (Alpha Step  
16 500, Tencor). The films were annealed at 170°C for 20 min under a nitrogen atmosphere. Gold  
17 source and drain electrodes were evaporated on top of the semiconductor layers (80 nm). For all  
18 measurements, typical channel widths (W) and lengths (L) were 1000 μm and 100 μm,  
19 respectively.

20

## 1 Synthesis

2 The polymers were prepared by Stille coupling polymerization. All polymers were purified by  
3 precipitation into methanol following subsequent Soxhlet extraction with methanol, hexane, and  
4 chloroform. The polymers showed good solubility in common organic solvent such as  
5 chloroform and chlorobenzene. Gel permeation chromatography (GPC) analysis against a  
6 polystyrene standard in chlorobenzene exhibited a number average molecular weight ( $M_n$ ) of  
7 108 kDa, 189 kDa, 81 kDa, and 295 kDa, and polydispersity indexes (PDI) of 2.98, 2.29, 2.72,  
8 and 2.36 for P-24-IIDTVT, P-24-IIDSVS, P-29-IIDTVT, and P-29-IIDSVS, respectively. The  
9 thermal stability of polymers was characterized by thermogravimetry analysis (TGA) (See  
10 supporting Figure S4). All of the polymers showed 5% weight loss above 400 °C. The thermal  
11 transitions of the polymers were not observed in the differential scanning calorimetry (DSC) (See  
12 supporting Figure S4).

13 All chemicals were purchased from Aldrich and Alfa : thiophene-2-carbonitrile, Lawesson's  
14 reagent, 11-(6'-bromohexyl)tricosane,<sup>[1,2]</sup> DMF, THF, NBS, n-BuLi, and 6-bromoisatin were  
15 used without further purification and (E)-1,2-di(selenophen-2-yl)ethene<sup>[3]</sup> were synthesized via  
16 published literature procedures.

17 <sup>1</sup>H-NMR and <sup>13</sup>C-NMR spectra were recorded using a Bruker AM-300 and DRX-500 MHz  
18 spectrometers. Molecular weights and polydispersities of the copolymers were determined by gel  
19 permeation chromatography(GPC) analysis with polystyrene standard calibration (waters high-  
20 pressure GPC assembly Model M515 pump, u-Styragel columns of HR4, HR4E, HR5E, with 500  
21 and 100 Å , refractive index detectors, solvent chloroform). Elemental analyses were recorded  
22 using a CHNS-932 (Leco) elemental analyzer. Thermal analysis was performed using a TA TGA  
23 2100 thermogravimetric analyzer under a nitrogen atmosphere at a heating rate of 10°C/min.



1 Differential scanning calorimeter (DSC) was conducted under nitrogen using a TA instrument  
 2 2100 DSC. The sample was heated at 10°C /min from 30°C to 250°C. UV–vis absorption spectra  
 3 were measured using a Perkin-Elmer LAMBDA-900 UV spectrophotometer. Cyclic  
 4 voltammetry (CV) was performed using an EG and G Parc model 273 Å potentiostat/galvanostat  
 5 system with a three-electrode cell in a solution containing Bu<sub>4</sub>NClO<sub>4</sub> (0.1 M) in acetonitrile at a  
 6 scan rate of 100 mV/s. The polymer films were coated on a square carbon electrode (0.50 cm<sup>2</sup>)  
 7 by dipping the electrode into the corresponding solvents then drying in air. A Pt wire was used as  
 8 the counter electrode, and an Ag/AgNO<sub>3</sub> (0.1 M) electrode was used as the reference electrode.

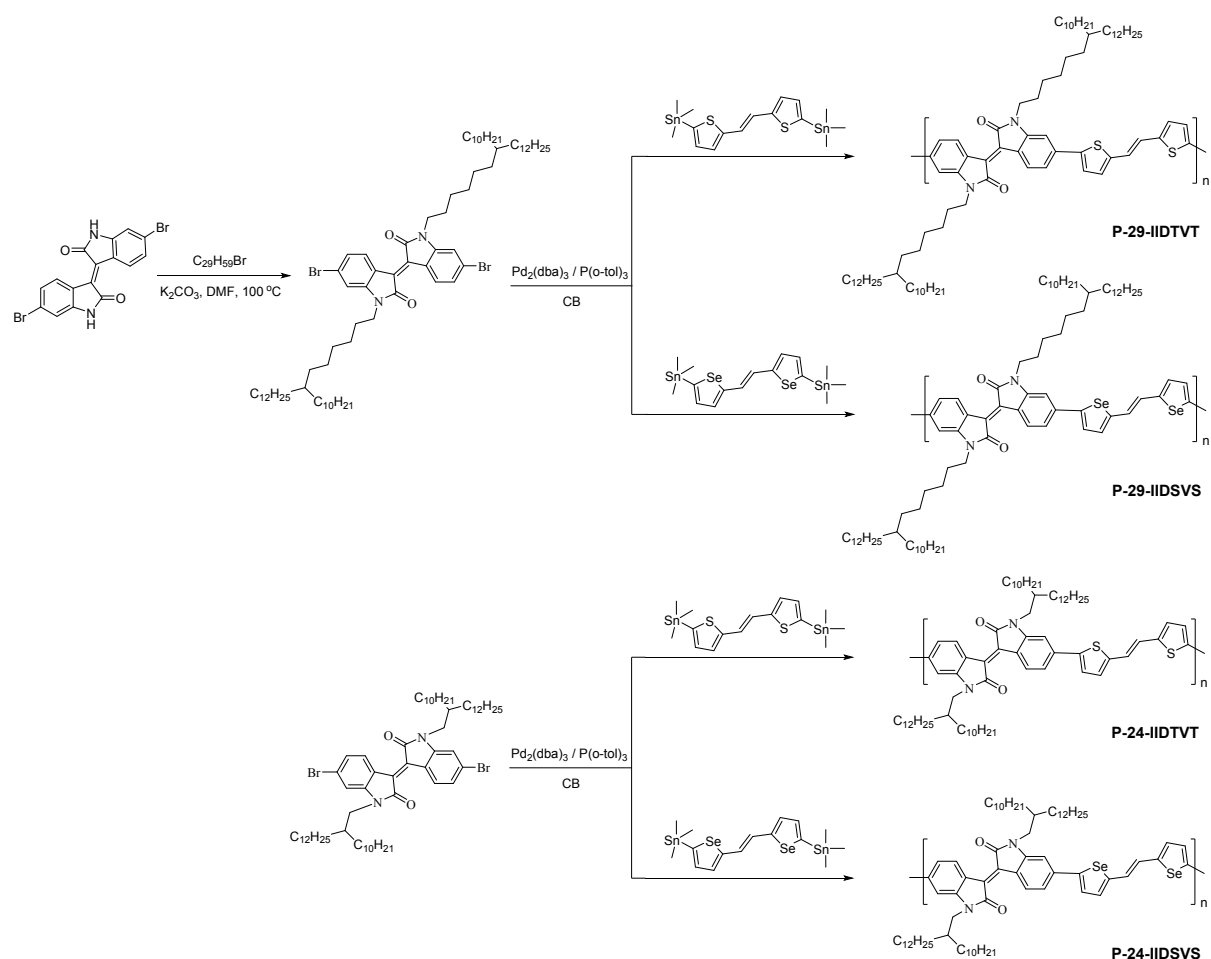

9

10 **Scheme S1. Synthetic routes of P-29-IID-TVT, P-29-IID-SVS, P-24-IID-TVT and P-29-IID-**  
 11 **SVS**

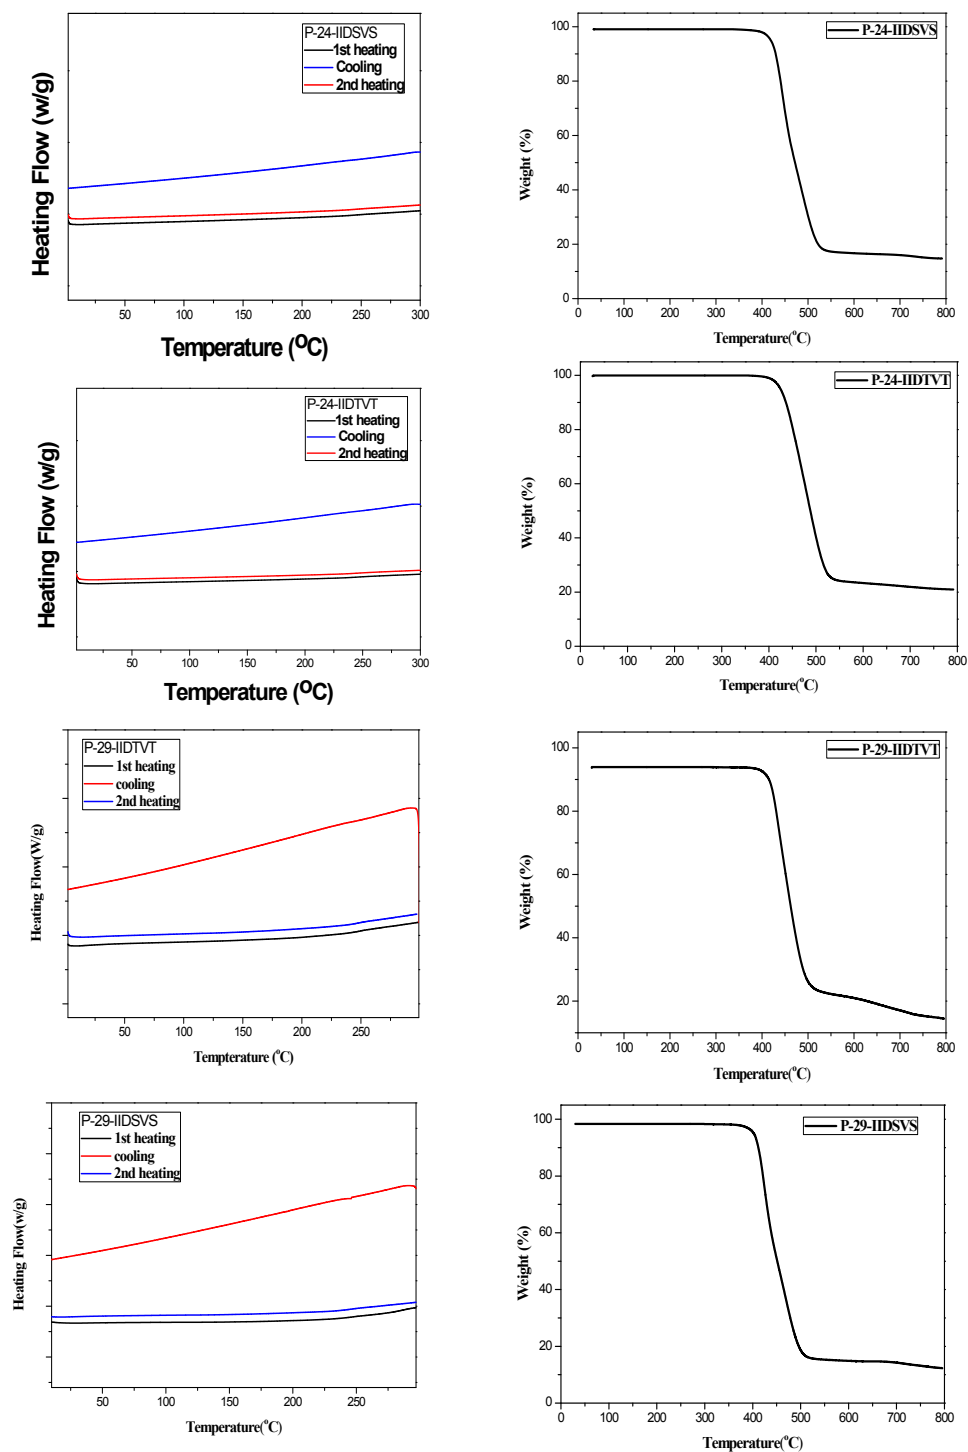

1

2 Figure S4. TGA and DSC thermograms of P-24-IID-TVT, P-24-IID-SVS, P-29-IID-TVT,  
3 P-29-IID-SVS.

4

## 1 Synthesis of 6,6'-dibromoisindigo.

2 The reaction was carried out by literature method.<sup>[4]</sup> A solution of 6-bromoisatin (5.0 g, 22.1  
3 mmol) and Lawesson's Reagent (4.4 g, 11.0 mmol) in 100 mL *o*-xylene were stirred at 50 °C for  
4 3 h. The reaction mixture was then cooled down to room temperature. After removal of solvent,  
5 the crude product was filtrated and washed with hot methanol.  
6

## 7 Synthesis of 6,6'-dibromo-(N,N'-2-decyltetradecyl)-isoindigo.

8 After 6,6'-dibromoisindigo (1.0 g, 2.3 mmol) was dissolved in *N,N'*-dimethylformamide (70  
9 mL), potassium carbonate (1.3 g, 9.5 mmol) and 11-(bromomethyl)tricosane (7.9 g, 19.0 mmol)  
10 were added under nitrogen. The mixture was stirred for 22 h at 100 °C. After cooling down, the  
11 mixture was poured into water and extracted with CH<sub>2</sub>Cl<sub>2</sub> and dried over MgSO<sub>4</sub>. After removal  
12 of the solvent under reduced pressure, the residue was purified via chromatography with silica  
13 (Hexane: DCM = 1:5) and recrystallized from dichloromethane, hexane, and methanol. Yield:  
14 0.7 g (28%). <sup>1</sup>H-NMR (300 MHz, CDCl<sub>3</sub>): δ = 9.1 (d, 2H), 7.20-7.16 (d, 2s), 6.92 (d, 2H), 3.65-  
15 3.63 (t, 4H), 1.96-1.84 (m, 2H), 1.31-1.22 (m, 80H), 0.91-0.87 (t, 12H). Element Anal.  
16 C<sub>64</sub>H<sub>104</sub>Br<sub>2</sub>N<sub>2</sub>O<sub>2</sub> Cal: C, 70.31; H, 9.59; Br, 14.62; N, 2.56; Found: C, 70.38; H, 9.54; N, 2.53.  
17

## 18 Synthesis of 6,6'-dibromo-(N,N'-2-decylnonadecyl)-isoindigo.

19 After 6,6'-dibromoisindigo (1.0 g, 2.3 mmol) was dissolved in *N,N'*-dimethylformamide (70  
20 mL), potassium carbonate (1.3 g, 9.5 mmol) and 11-(6-bromohexyl)tricosane (9.2 g, 19.0 mmol)  
21 were added under nitrogen. The mixture was stirred for 22 h at 100 °C. After cooling down, the  
22 mixture was poured into water and extracted with CH<sub>2</sub>Cl<sub>2</sub> and dried over MgSO<sub>4</sub>. After removal  
23 of the solvent under reduced pressure, the residue was purified via chromatography with silica  
24 (Hexane: DCM = 1:5) and recrystallized from dichloromethane, hexane, and methanol. Yield :  
25 0.6 g (25%). <sup>1</sup>H-NMR (300 MHz, CDCl<sub>3</sub>): δ = 9.12 (d, 2H), 7.20-7.17 (d, 2s), 6.95 (d, 2H), 3.77-  
26 3.72 (t, 4H), 1.73-1.67 (m, 4H), 1.27-1.22 (m, 98H), 0.91-0.87 (t, 12H). <sup>13</sup>C-NMR (500 MHz,  
27 CDCl<sub>3</sub>): 167.749, 145.800, 132.672, 131.222, 126.750, 125.142, 120.430, 111.324, 37.366,  
28 33.634, 31.940, 30.167, 29.733, 29.676, 29.380, 27.416, 27.040, 26.696, 22.708, 14.141.  
29 Element Anal. C<sub>74</sub>H<sub>124</sub>Br<sub>2</sub>N<sub>2</sub>O<sub>2</sub> Cal: C, 72.05; H, 10.13; Br, 12.95; N, 2.27; Found: C, 72.22; H,  
30 10.20; N, 2.30.  
31

## 32 Synthesis of poly[6,6'-dibromo-(N,N'-2-decyltetradecyl)-isoindigo-(E)-1,2-di(thiophen-2- 33 yl)ethene] (P-24-IID-TVT).

34 To a Schlenk flask was added 6,6'-dibromo-(N,N'-2-decyltetradecyl)-isoindigo (0.3000 g, 0.274  
35 mmol), (E)-1,2-bis(5-(trimethylstannyl)thiophen-2-yl)ethene (0.142 g, 0.274 mmol) and  
36 chlorobenzene (5 mL) under nitrogen. After degassing under nitrogen for 30 min, Pd<sub>2</sub>(dba)<sub>3</sub> (5.0  
37 mg, 0.005 mmol) and P(*o*-tol)<sub>3</sub> (6.6 mg, 0.021 mmol) were added to the mixture, which was then  
38 stirred for 48 h at 140 °C. 2-Bromothiophene and tributyl(thiophen-2-yl)stannane were injected  
39 sequentially into the reaction mixture for end-capping, and the solution was stirred for 6 h after  
40 each addition. After cooling to room temperature, the polymer was precipitated in 100 mL

1 methanol. The crude polymer was collected by filtration and purified by Soxhlet extraction with  
2 methanol, acetone, hexane and chloroform successively. The final product IID<sub>24</sub> -TVT was  
3 obtained by precipitation in methanol. Yield : 0.20 g. Element Anal. C<sub>74</sub>H<sub>110</sub>N<sub>2</sub>O<sub>2</sub>S<sub>2</sub> Cal: C,  
4 79.14; H, 9.80; N, 2.49; S, 5.70; Found: C, 79.36; H, 10.00; N, 2.49; S, 5.52.

5  
6 **Synthesis of poly[6,6'-dibromo-(N,N'-2-decyltetradecyl)-isoindigo-(E)-1,2-di(selenophen-2-**  
7 **yl)ethene] (P-24-IID-SVS).**

8 To a Schlenk flask was added 6,6'-dibromo-(N,N'-2-decyltetradecyl)-isoindigo (0.3000 g, 0.274  
9 mmol), (E)-1,2-bis(5-(trimethylstannyl)selenophen-2-yl)ethene (0.1678 g, 0.274 mmol) and  
10 chlorobenzene (5 mL) under nitrogen. After degassing under nitrogen for 30 min, Pd<sub>2</sub>(dba)<sub>3</sub> (5.0  
11 mg, 0.005 mmol) and P(o-tol)<sub>3</sub> (6.6 mg, 0.021 mmol) were added to the mixture, which was then  
12 stirred for 48 h at 140 °C. 2-Bromothiophene and tributyl(thiophen-2-yl)stannane were injected  
13 sequentially into the reaction mixture for end-capping, and the solution was stirred for 6 h after  
14 each addition. After cooling to room temperature, the polymer was precipitated in 100 mL  
15 methanol. The crude polymer was collected by filtration and purified by Soxhlet extraction with  
16 methanol, acetone, hexane and chloroform successively. The final product IID<sub>24</sub> -SVS was  
17 obtained by precipitation in methanol. Yield : 0.22 g, <sup>1</sup>H-NMR (300 MHz, CDCl<sub>3</sub>): δ = 9.15 (br,  
18 2H), 7.62-6.92 (br, 4H), 3.73 (s, 2H), 1.25 (br, 84H), 0.87 (br, 12H). Element Anal.  
19 C<sub>74</sub>H<sub>110</sub>N<sub>2</sub>O<sub>2</sub>Se<sub>2</sub> Cal: C, 73.02; H, 9.04; N, 2.30; Se, 12.99; Found: C, 72.23; H, 9.08; N, 2.27.

20

21 **Synthesis of poly[6,6'-dibromo-(N,N'-2-decylnonadecyl)-isoindigo-(E)-1,2-di(thiophen-2-**  
22 **yl)ethene] (P-29-IID-TVT).**

23 To a Schlenk flask was added 6,6'-dibromo-(N,N'-2-decylnonadecyl)-isoindigo (0.3000 g, 0.243  
24 mmol), (E)-1,2-bis(5-(trimethylstannyl)thiophen-2-yl)ethene (0.1259 g, 0.243 mmol) and  
25 chlorobenzene (5 mL) under nitrogen. After degassing under nitrogen for 30 min, Pd<sub>2</sub>(dba)<sub>3</sub> (4.4  
26 mg, 0.004 mmol) and P(o-tol)<sub>3</sub> (5.9 mg, 0.019 mmol) were added to the mixture, which was then  
27 stirred for 48 h at 140 °C. 2-Bromothiophene and tributyl(thiophen-2-yl)stannane were injected  
28 sequentially into the reaction mixture for end-capping, and the solution was stirred for 6 h after  
29 each addition. After cooling to room temperature, the polymer was precipitated in 100 mL  
30 methanol. The crude polymer was collected by filtration and purified by Soxhlet extraction with  
31 methanol, acetone, hexane and chloroform successively. The final product IID<sub>29</sub> -TVT was  
32 obtained by precipitation in methanol. Yield : 0.26 g, <sup>1</sup>H-NMR (500 MHz, CDCl<sub>3</sub>): δ = 9.12 (s,  
33 2H), 7.39-6.90 (br, 4H), 3.75 (s, 2H), 3.32 (s, 2H), 1.29-0.79 (br, 114H). FT-IR (cm<sup>-1</sup>): 3122  
34 (aromatic), 2922-2854 (aliphatic, C-H), 1684-1611 (C=C). Element Anal. Cal. C<sub>84</sub>H<sub>130</sub>N<sub>2</sub>O<sub>2</sub>S<sub>2</sub>: C,  
35 79.87; H, 10.30; N, 2.21; S, 5.07; Found: C, 79.62; H, 10.41; N, 2.23; S, 5.06.

36

37 **Synthesis of poly[6,6'-dibromo-(N,N'-2-decylnonadecyl)-isoindigo-(E)-1,2-di(selenophen-2-**  
38 **yl)ethene] (P-29-IID-SVS).**

39 To a Schlenk flask was added 6,6'-dibromo-(N,N'-2-decylnonadecyl)-isoindigo (0.3000 g, 0.243  
40 mmol), (E)-1,2-bis(5-(trimethylstannyl)selenophen-2-yl)ethene (0.1487 g, 0.243 mmol) and

1 chlorobenzene (5 mL) under nitrogen. After degassing under nitrogen for 30 min,  $\text{Pd}_2(\text{dba})_3$  (4.4  
 2 mg, 0.004 mmol) and  $\text{P}(\text{o-tol})_3$  (5.9 mg, 0.019 mmol) were added to the mixture, which was then  
 3 stirred for 48 h at 140 °C. 2-Bromothiophene and tributyl(thiophen-2-yl)stannane were injected  
 4 sequentially into the reaction mixture for end-capping, and the solution was stirred for 6 h after  
 5 each addition. After cooling to room temperature, the polymer was precipitated in 100 mL  
 6 methanol. The crude polymer was collected by filtration and purified by Soxhlet extraction with  
 7 methanol, acetone, hexane and chloroform successively. The final product IID<sub>29</sub>-SVS was  
 8 obtained by precipitation in methanol. Yield : 0.24 g,  $^1\text{H-NMR}$  (500 MHz,  $\text{CDCl}_3$ ):  $\delta$  = 8.82 (br,  
 9 2H), 7.49-7.07 (br, 4H), 3.43 (br, 4H), 1.34-0.89 (br, 114H). FT-IR ( $\text{cm}^{-1}$ ): 3126 (aromatic),  
 10 2922-2844 (aliphatic, C-H), 1684-1606 (C=C). Element Anal.  $\text{C}_{84}\text{H}_{130}\text{N}_2\text{O}_2\text{Se}_2$  Cal: C, 74.33; H,  
 11 9.58; N, 2.06; Se, 11.65; Found: C, 74.16; H, 9.62; N, 2.16.

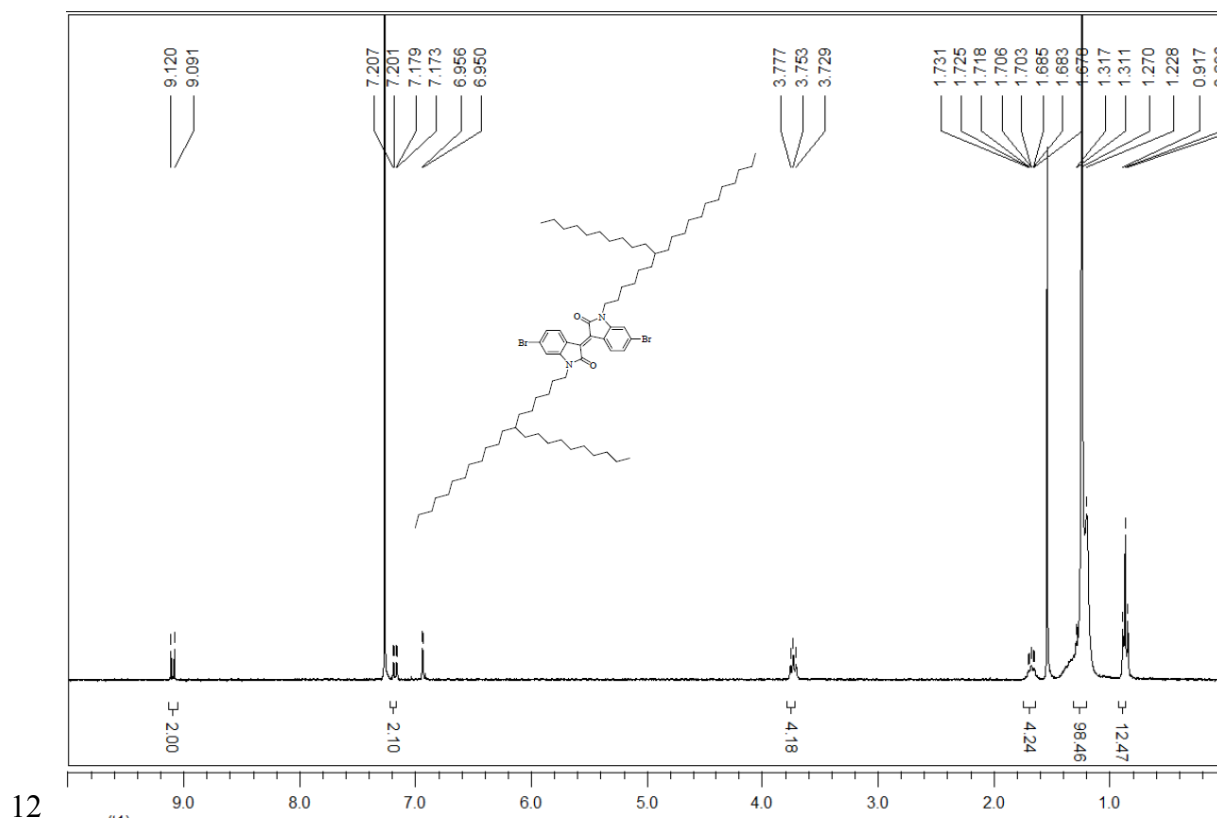

13 **Figure S5.  $^1\text{H-NMR}$  of 6,6'-dibromo-(N,N'-2-decylnonadecyl)-isoindigo**

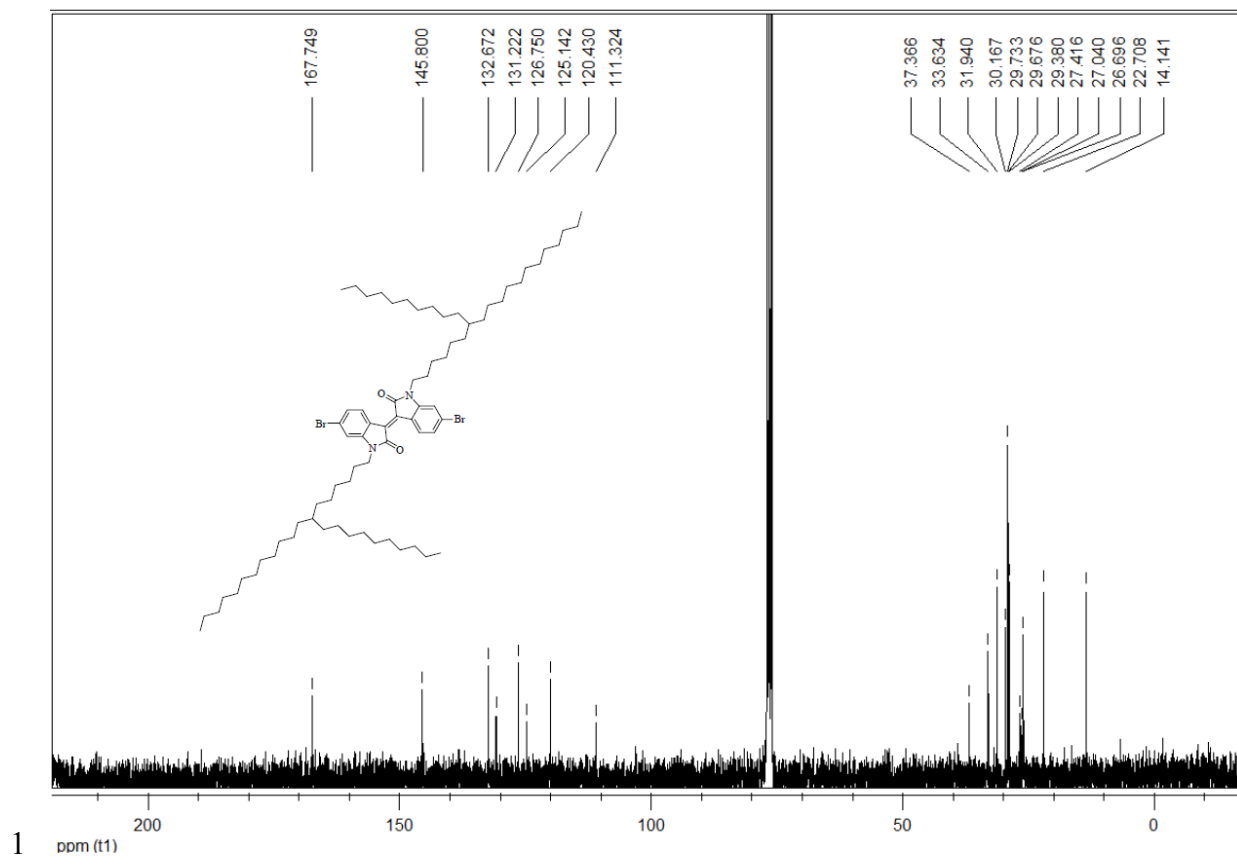

2 **Figure S6. <sup>13</sup>C-NMR of 6,6'-dibromo-(N,N'-2-decylnonadecyl)-isoindigo**

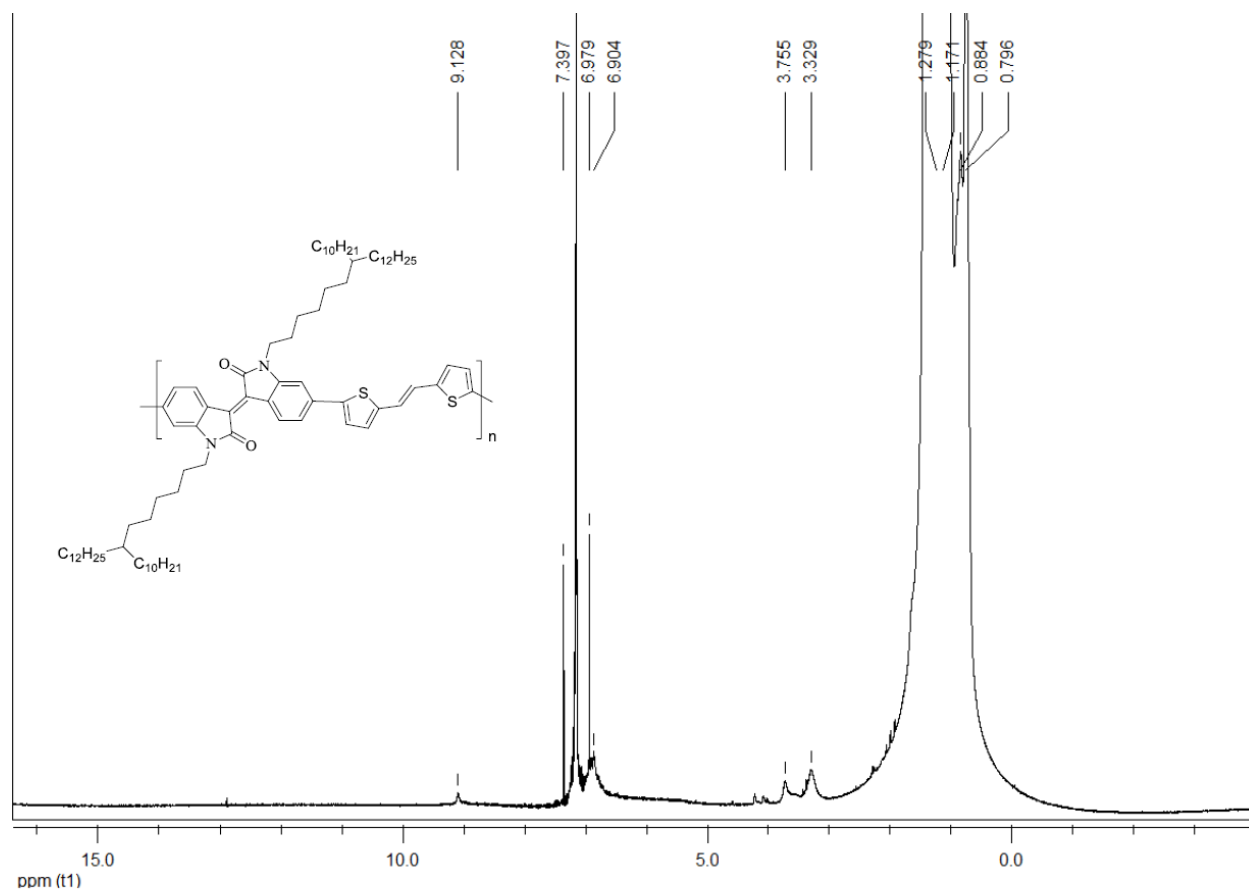

1

2 **Figure S7. <sup>1</sup>H-NMR of poly[6,6'-dibromo-(N,N'-2-decylnonadecyl)-isoindigo-(E)-1,2-**  
 3 **di(thiophen-2-yl)ethene] (P-29-IIDTVT).**

4

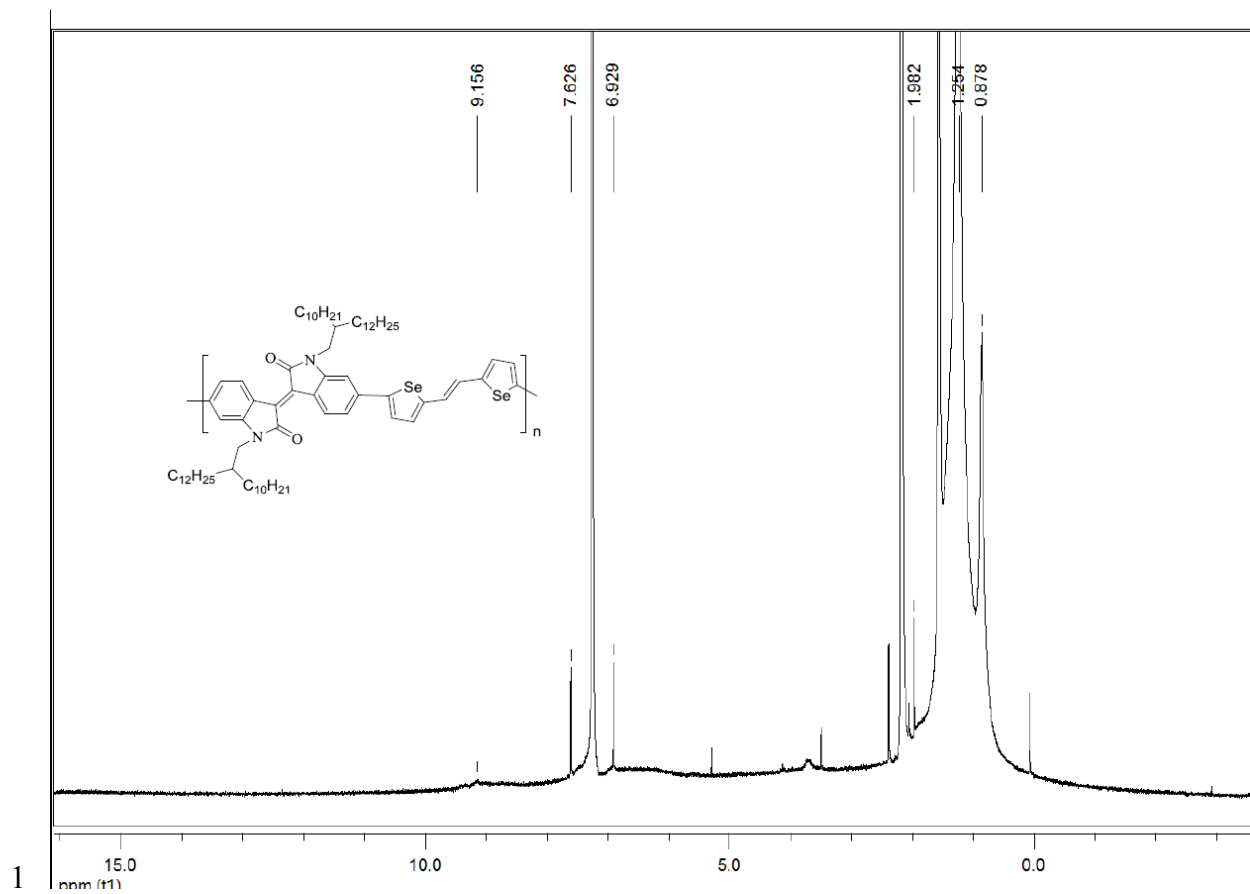

**Figure S8. <sup>1</sup>H-NMR of poly[6,6'-dibromo-(N,N'-2-decylnonadecyl)-isoindigo-(E)-1,2-di(thiophen-2-yl)ethene] (P-24-IIDSVS).**



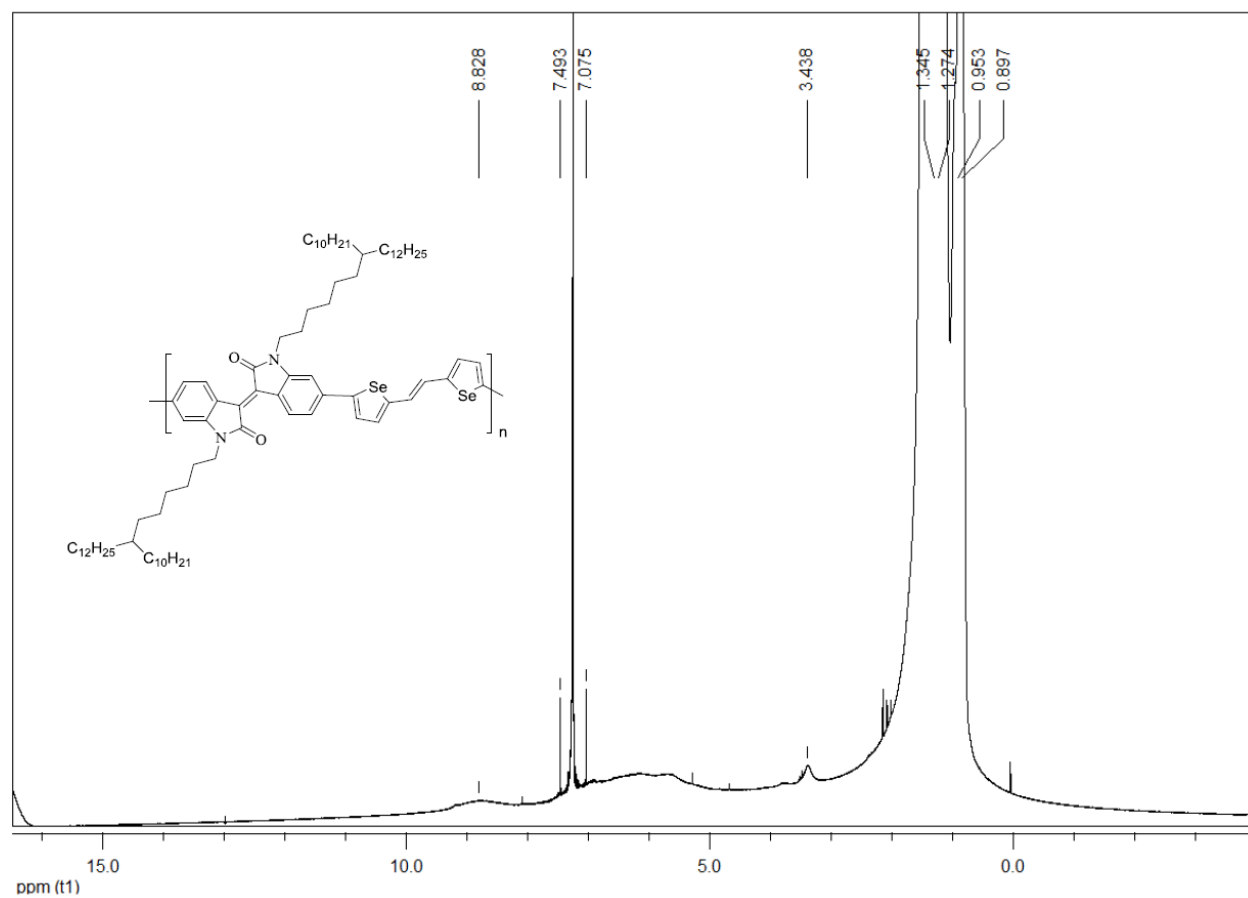

1

2 **Figure S9. <sup>1</sup>H-NMR of poly[6,6'-dibromo-(N,N'-2-decylnonadecyl)-isoindigo-(E)-1,2-**  
 3 **di(thiophen-2-yl)ethene] (P-29-IIDSVS).**

4

5

6

7

8 Reference

9 [1] I. Kang, H.-J. Yun, D. S. Chung, S.-K. Kwon, Y.-H. Kim, *J. Am. Chem. Soc.* 2013, 135,

10 14896.

- 1 [2] J.Y. Back, H. Yu, I. Song, I. Kang, H. Ahn, T.J. Shin, S.K. Kwon, J.H. Oh, Y.H. Kim, Chem.  
2 Mater. 2015, DOI: 10.1021/cm504545e
- 3 [3] S. C. Ng, H. S. O. Chan, T. T. Ong, K. Kumura, Y. Mazaki, K. Kobayashi *Macromolecules*.  
4 1988, *31*, 1221.
- 5 [4] J. Mei, K.R. Graham, R. Stalder, J.R. Reynolds. *Org. Lett.* 2010, *12*, 660  
6  
7
